# Supplementary material for: Development of an algorithm for evaluating the impact of measurement variability on response categorization in oncology trials
Source: Springer Nature journal article supplement (doi:10.1186/s12874-019-0727-7), 2019-05-02

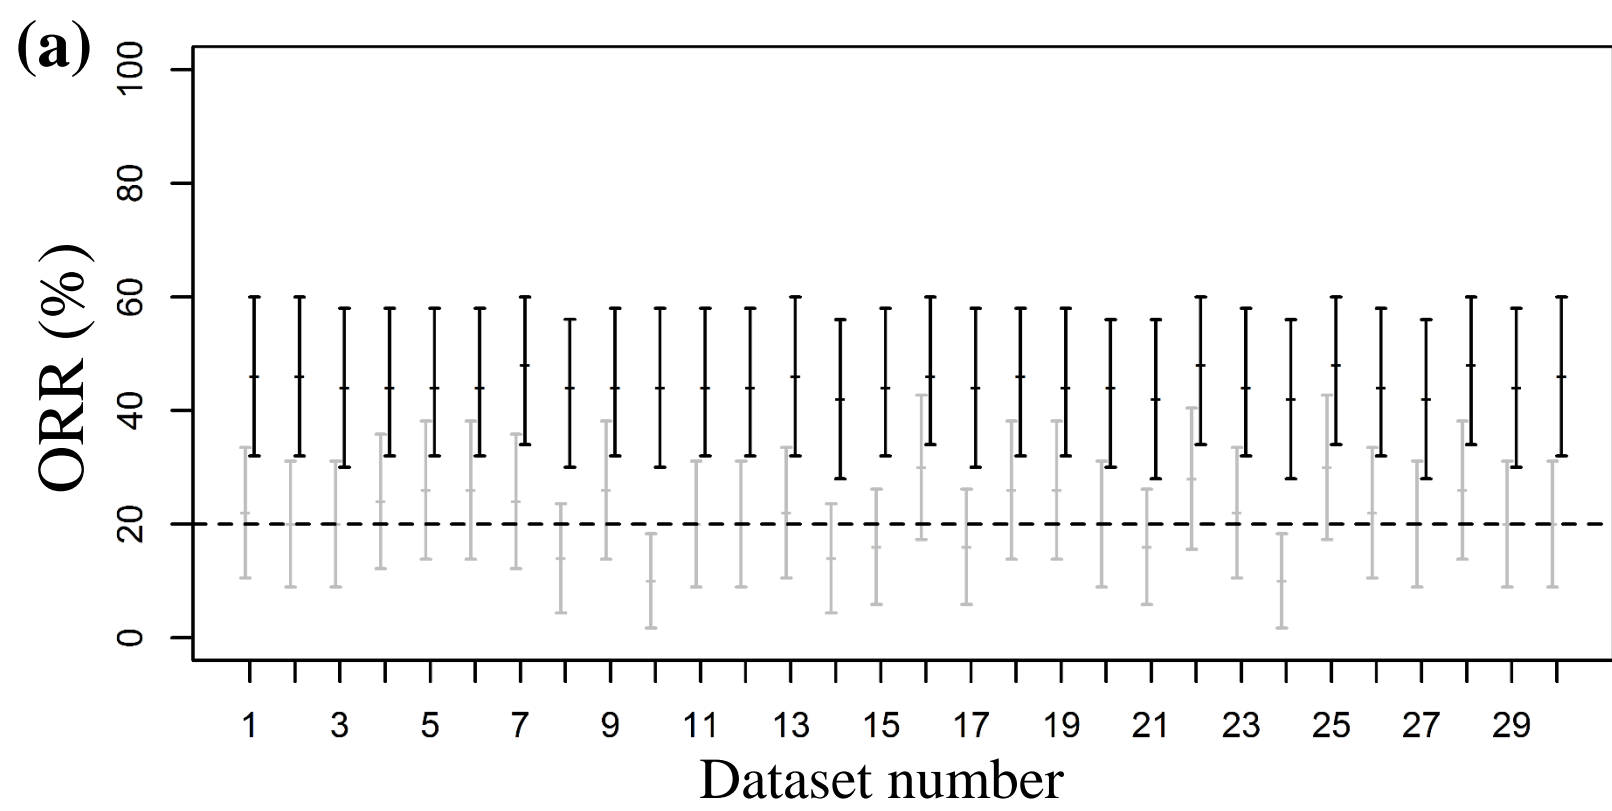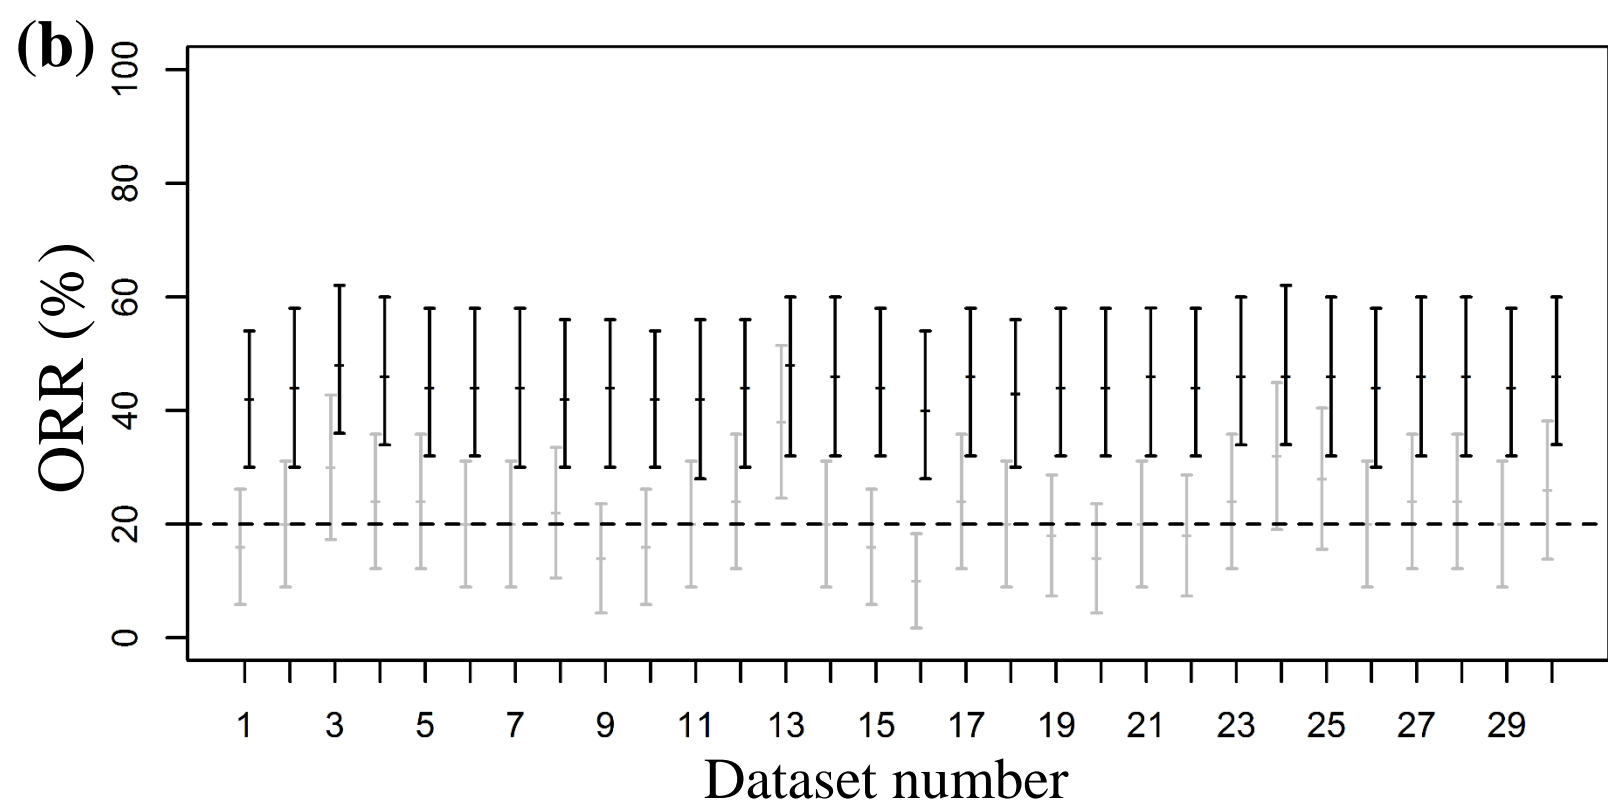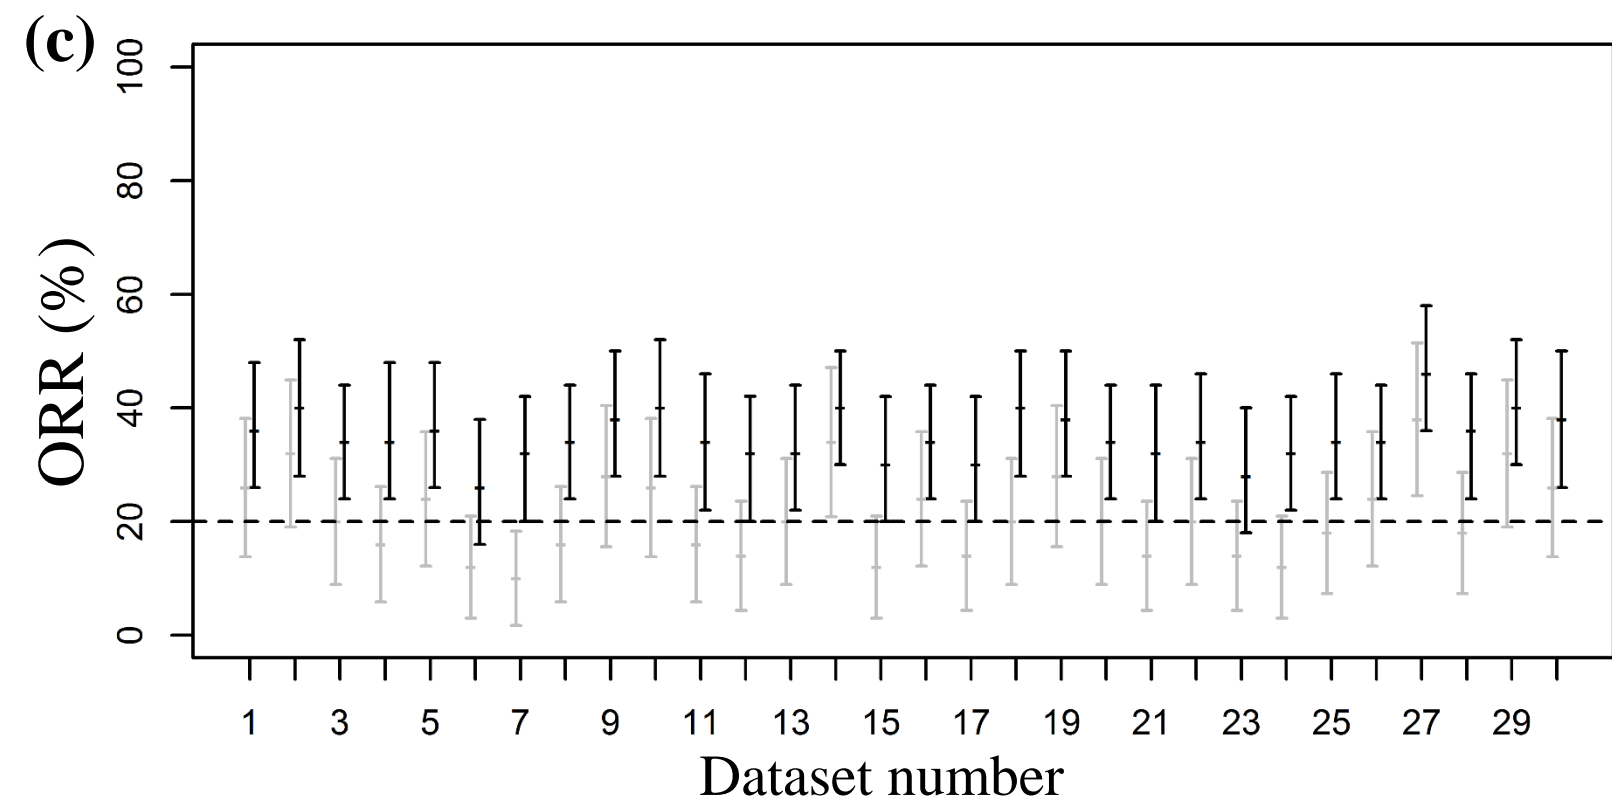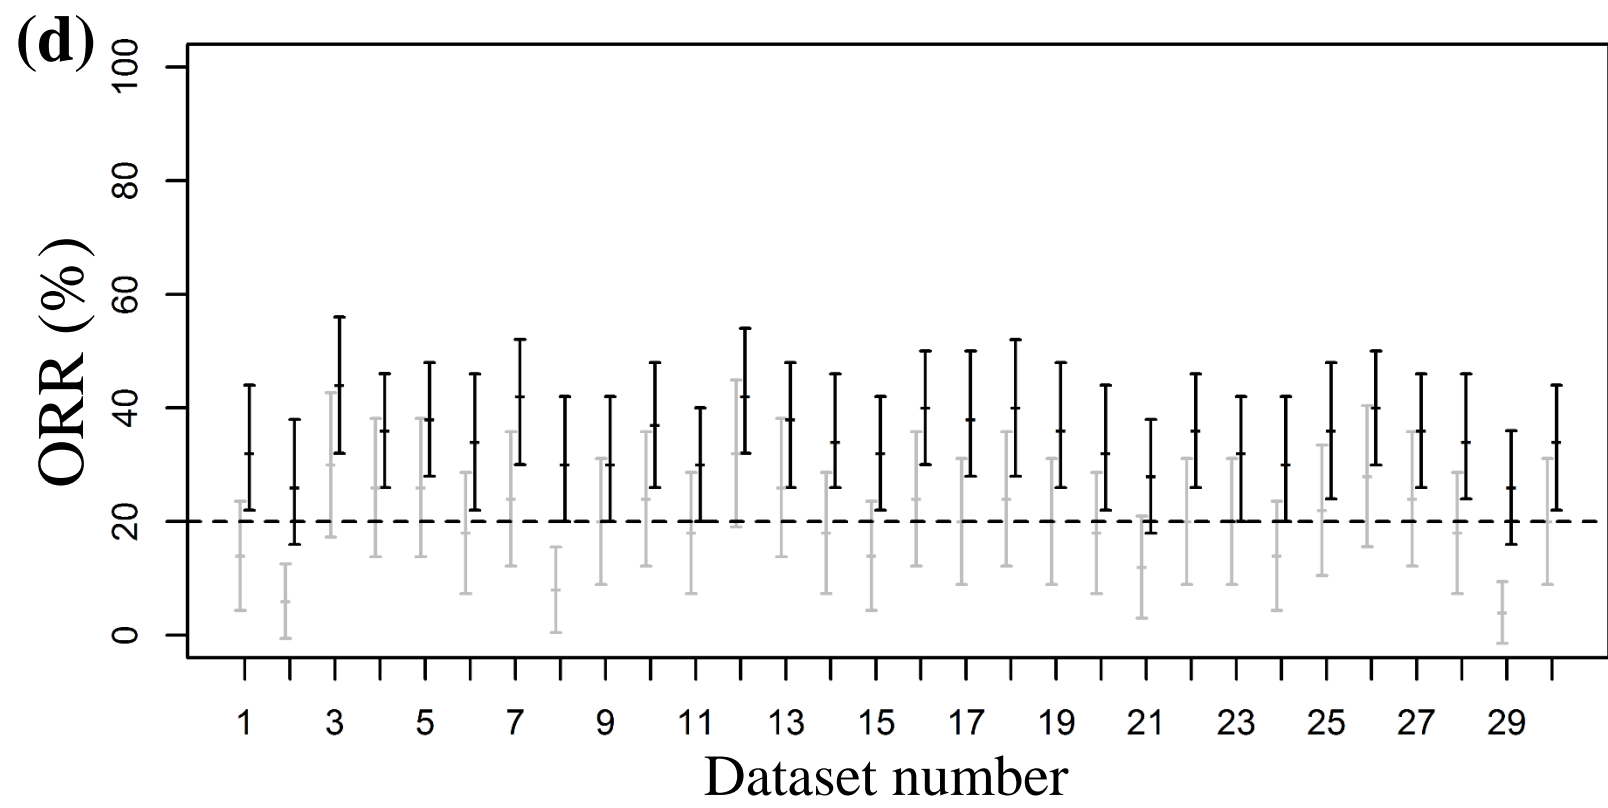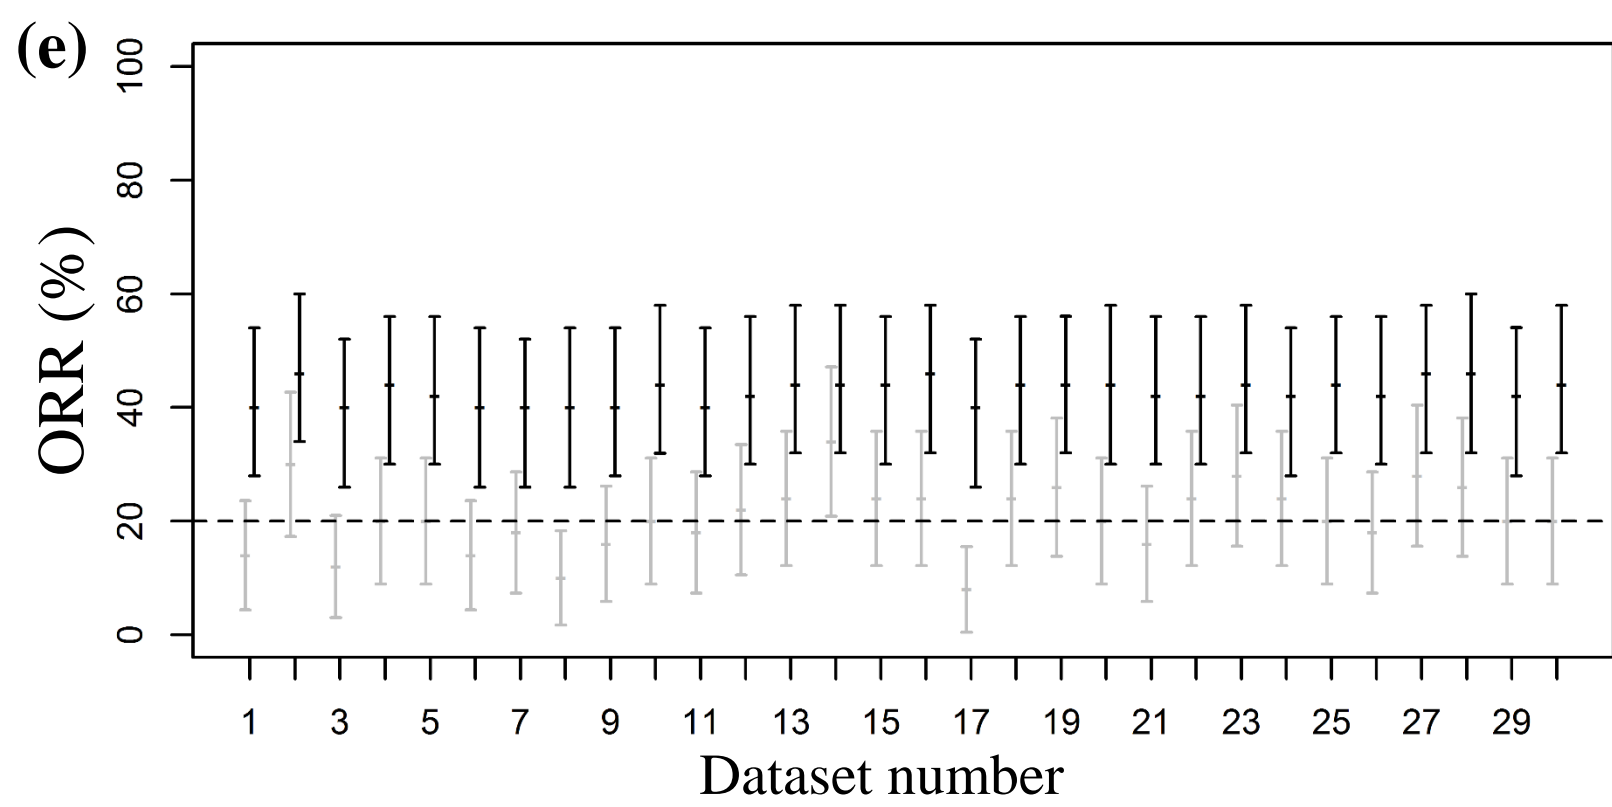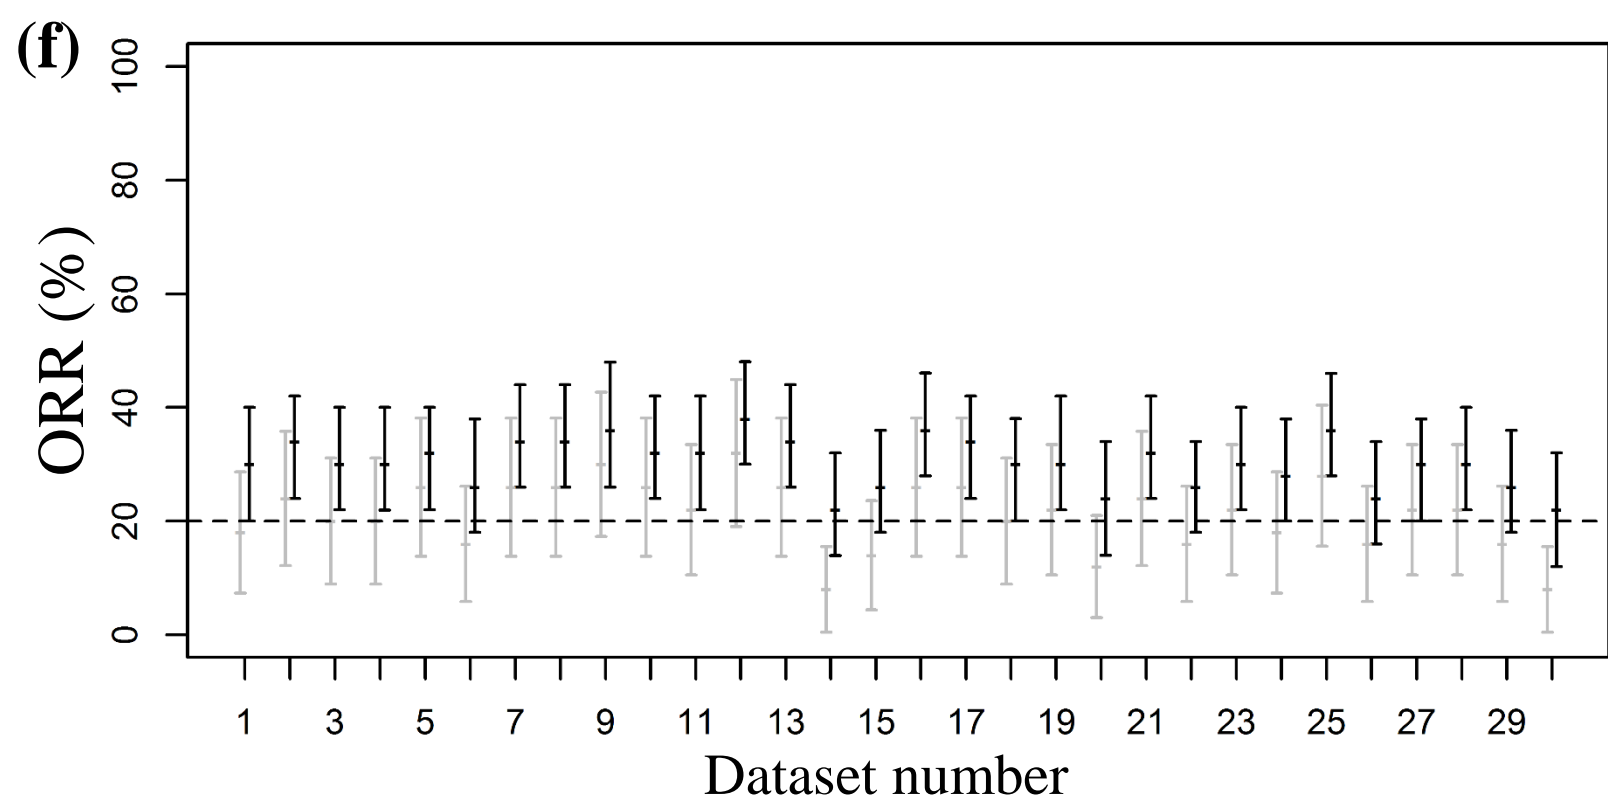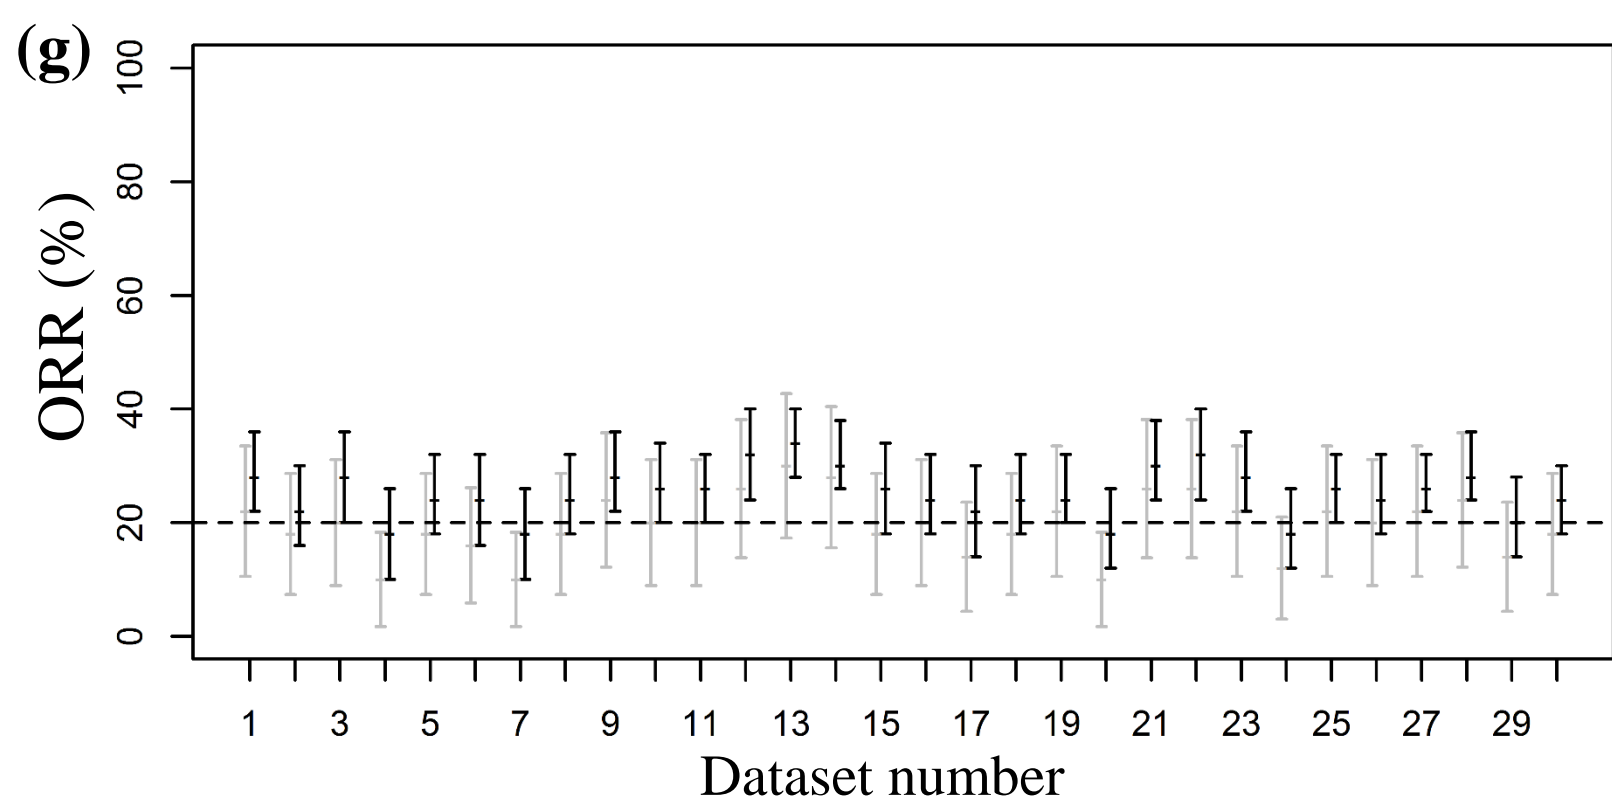

Supplement: MOESM2 [file 16691884]
