# Supplementary material for: Development of an algorithm for evaluating the impact of measurement variability on response categorization in oncology trials
Source: BMC Med Res Methodol. 2019 May 2;19:90. doi: 10.1186/s12874-019-0727-7 (PMC6498480; doi:10.1186/s12874-019-0727-7)
Supplement: Supplementary file 1 — Formulas of the LOAs on the original scale for the nth root-transformed variables. (DOCX 18 kb) [file 12874_2019_727_MOESM1_ESM.docx]

**Formulas of the LOAs on the original scale for the nth root-transformed variables**

A 95% LOA for the *n*th root transformation of the measurement, , is , with α(SD: the standard deviation of the difference between the *n*th root transformed for two measurements per subject). Subsequently, it can be plotted on the original scale in a conventional Bland-Altman plot [1]: is between and for a given value according to the mean value theorem (: the first measurement: the second measurement: the average of ). For example, when the measurements are transformed with the square root, the intra-reader LOA and the inter-reader LOA on the original scale are and , respectively. , , and were estimated using a hierarchical linear mixed-effects model including lesions, readers, and the interaction effects of lesions and readers as random effects.

# **References**

1. Euser AM, Dekker FW, le Cessie S: **A practical approach to Bland-Altman plots and variation coefficients for log transformed variables**. *Journal of clinical epidemiology* 2008, **61**(10):978-982.
